# Supplementary material for: Simulation of present and future land subsidence in the Rafsanjan plain, Iran, due to groundwater overexploitation using numerical modeling and InSAR data analysis
Source: Springer Nature journal article supplement (doi:10.1007/s10040-023-02657-y), 2023-07-18
Supplement: MOESM1 [file 10040_2023_2657_MOESM1_ESM.pdf]

---

Supplemental material for

**Simulation of present and future land subsidence in the Rafsanjan plain,  
Iran, due to groundwater overexploitation using numerical modeling and  
InSAR data analysis**

M. Bockstiegel<sup>a</sup>, J.C. Richard-Cerda<sup>a</sup>, E. Muñoz-Vega<sup>a</sup>, M.H. Haghghi<sup>b</sup>, M. Motagh<sup>b,c</sup>,  
R. Lalehzari<sup>d</sup>, S. Schulz<sup>a</sup>

<sup>a</sup>Technische Universität Darmstadt, Institute of Applied Geosciences,  
Schnittspahnstraße 9, 64287 Darmstadt, Germany

<sup>b</sup>Institute of Photogrammetry and GeoInformation, Leibniz University Hannover,  
30167 Hannover, Germany

<sup>c</sup>Helmholtz Centre Potsdam, GFZ German Research Centre for Geosciences,  
14473 Potsdam, Germany

<sup>d</sup>School of Civil Engineering, College of Engineering, University of Tehran, Tehran, Iran

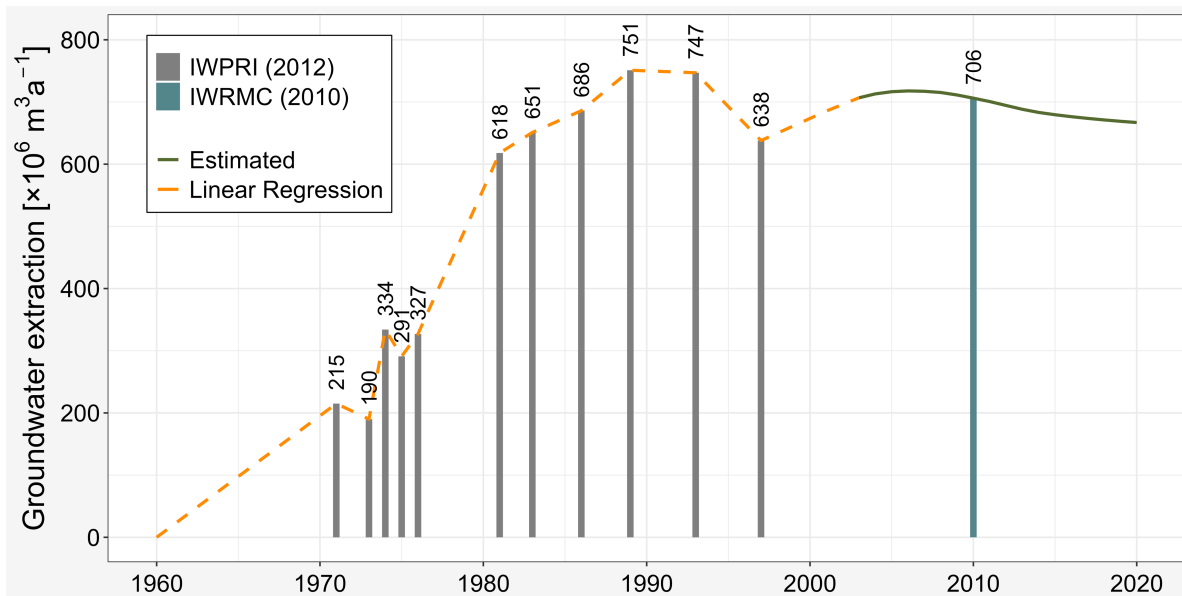

**Fig. S1** Total groundwater extraction used for the entire modeling period

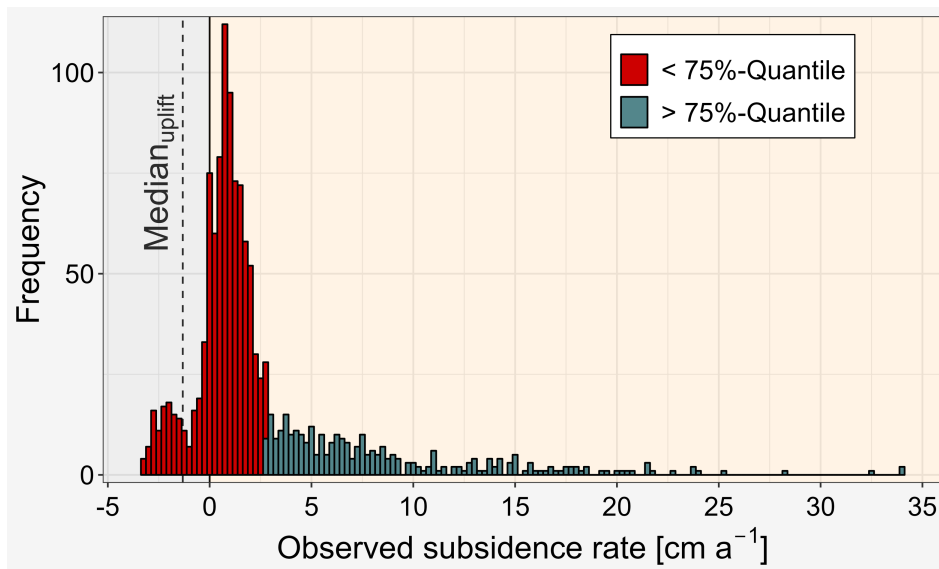

**Fig. S2** Distribution of observed subsidence rates in randomly generated points

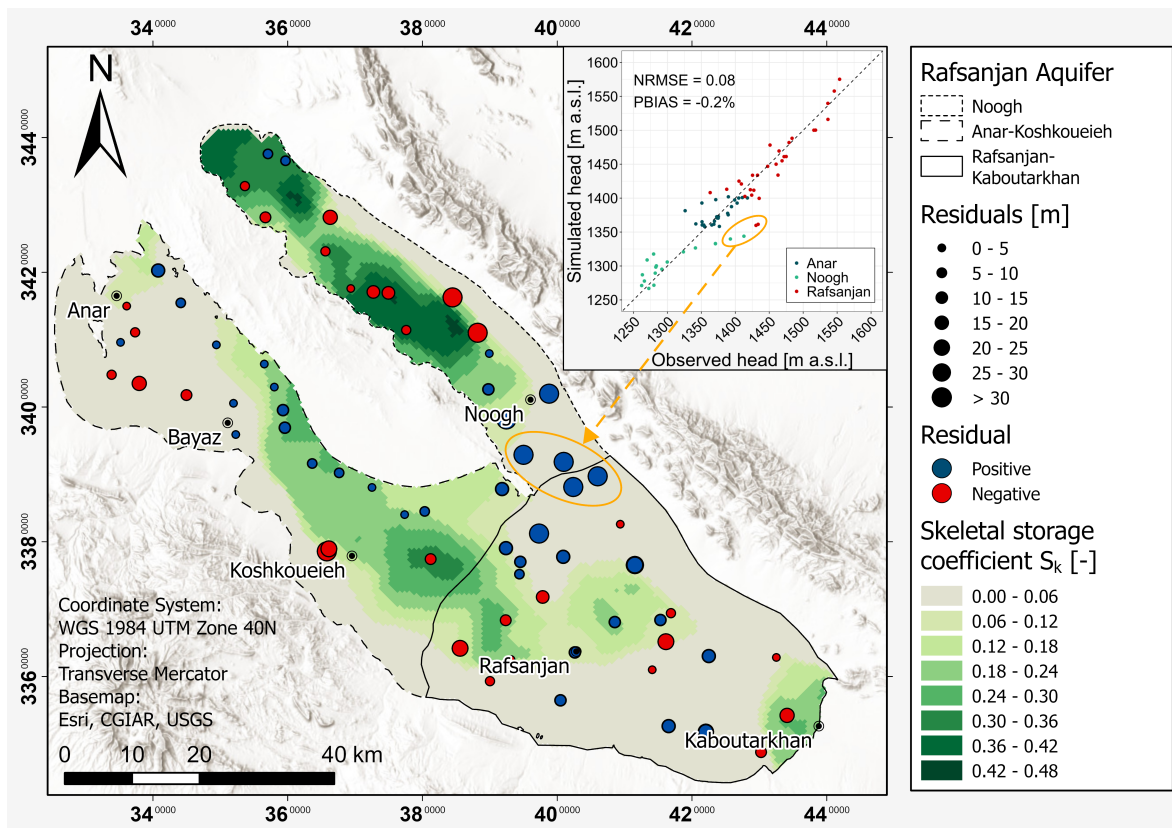

**Fig. S3** Distribution of skeletal storage coefficients and comparison of head residuals of first observed heads in transient state
